# Supplementary material
Source: Springer Nature journal article supplement (https://www.springermedizin.de/resource/supplementary/13023_2008_140_MOESM2_ESM.pdf/9641776)

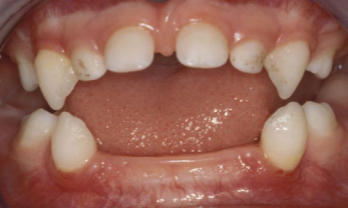

Supplement: MOESM2 [file 9641776]
